# Supplementary material for: Temporal trends of time to antiretroviral treatment initiation, interruption and modification: examination of patients diagnosed with advanced HIV in Australia
Source: PubMed Central journal article supplement (PMC4394156; doi:10.7448/ias.18.1.19463), 2015-04-10
Supplement: JIAS-18-19463-s001.pdf [file JIAS-18-19463-s001.pdf]

SDC Figure 1: Data linkage results. Frequency distribution of first HIV+ test result date component (day, month, year) by database (linked NHR date, pre-linkage AHOD date).

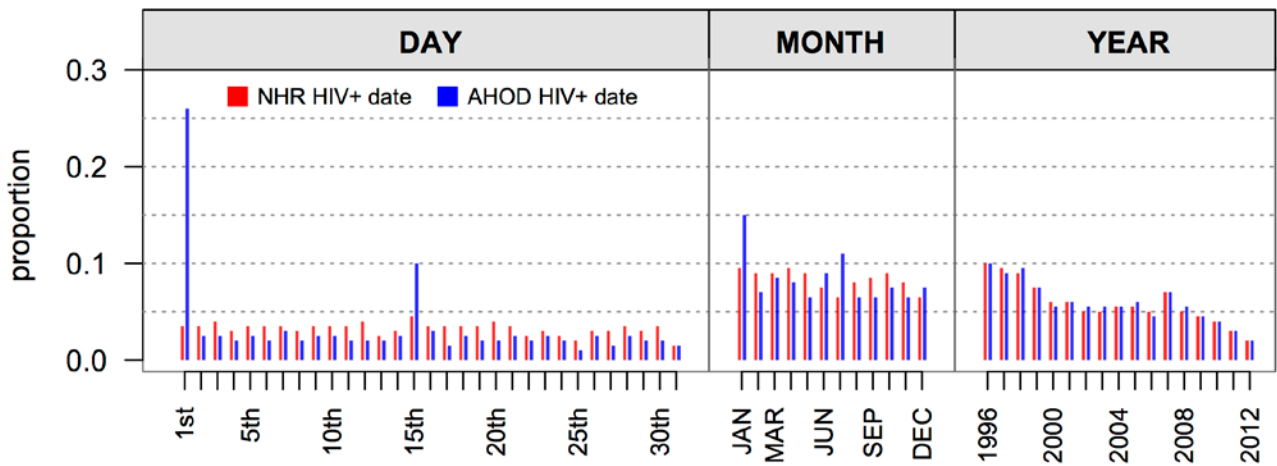

SDC Figure 2: CD4 cell count at HIV diagnosis: concordance plot between available AHOD data and corresponding NHR data (Lin's concordance correlation coefficient).

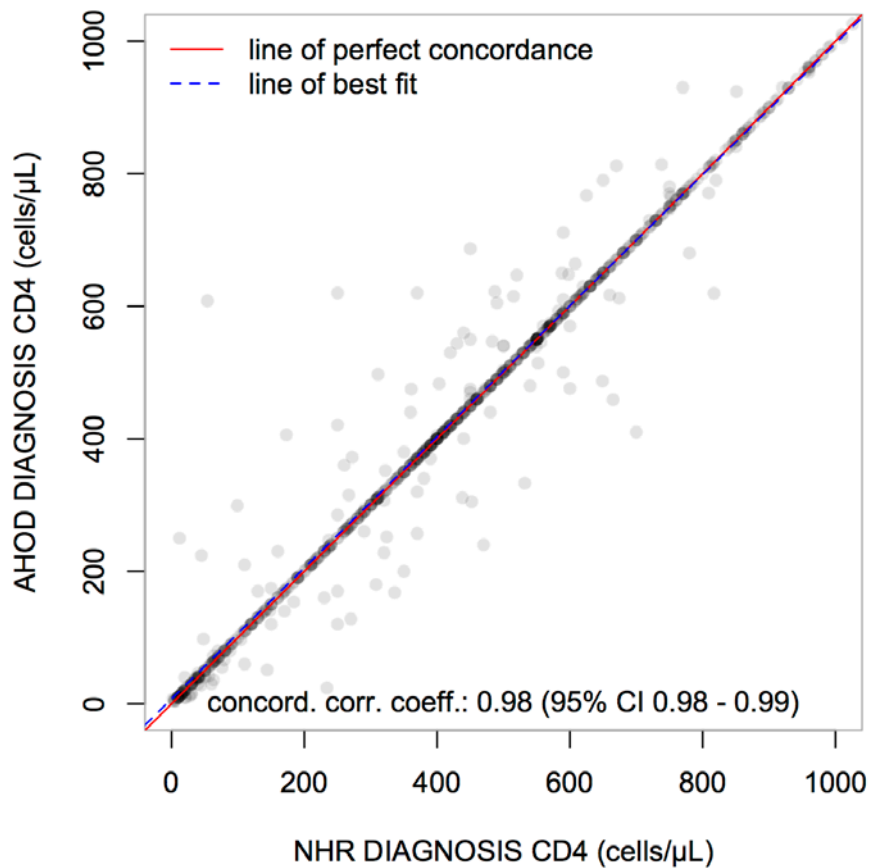

**SDC Table 1: AHOD & National HIV Registry linkage results: analysis population patient characteristics by inclusion/exclusion group**

| Factor                                | Level                | Overall Linkage |               | Matched Records |                |
|---------------------------------------|----------------------|-----------------|---------------|-----------------|----------------|
|                                       |                      | No Match N (%)  | Matched N (%) | Included N (%)  | Excluded N (%) |
| Number of Participants                | 3608                 | 626 (17)        | 2982 (83)     | 1202 (40)       | 1780 (60)      |
| Year of cohort enrolment              | 1999 to 2004         | 434 (69)        | 1938 (65)     | 497 (41)        | 1441 (81)      |
|                                       | 2005 to 2009         | 100 (16)        | 613 (21)      | 407 (34)        | 206 (12)       |
|                                       | 2010 to 2013         | 92 (15)         | 431 (14)      | 298 (25)        | 133 (7)        |
| Sex                                   | Female               | 70 (11)         | 157 (5)       | 84 (7)          | 73 (4)         |
|                                       | Male                 | 556 (89)        | 2855 (95)     | 1118 (93)       | 1707 (96)      |
| Age at cohort enrolment (years)       | <i>less</i> 30       | 41 (7)          | 296 (10)      | 182 (15)        | 114 (6)        |
|                                       | 30 to 40             | 232 (37)        | 1075 (36)     | 420 (35)        | 655 (37)       |
|                                       | 40 to 50             | 218 (35)        | 975 (33)      | 359 (30)        | 616 (35)       |
|                                       | <i>greater</i> 50    | 135 (22)        | 636 (21)      | 241 (20)        | 395 (22)       |
| Mode of probable HIV exposure         | MSM                  | 454 (73)        | 2252 (76)     | 842 (70)        | 1410 (80)      |
|                                       | Heterosexual         | 105 (17)        | 442 (15)      | 261 (22)        | 181 (10)       |
|                                       | IDU                  | 36 (6)          | 184 (6)       | 47 (4)          | 137 (8)        |
|                                       | Other                | 31 (5)          | 104 (3)       | 52 (4)          | 52 (3)         |
| Continental region of birth           | Australia            | 349 (56)        | 1857 (62)     | 747 (62)        | 1110 (62)      |
|                                       | NZ/Pacific Is.       | 20 (3)          | 72 (2)        | 30 (3)          | 42 (2)         |
|                                       | Africa               | 13 (2)          | 39 (1)        | 23 (2)          | 16 (1)         |
|                                       | Americas             | 13 (2)          | 39 (1)        | 17 (1)          | 20 (1)         |
|                                       | Asian                | 39 (6)          | 131 (4)       | 78 (6)          | 53 (3)         |
|                                       | Europe               | 36 (6)          | 156 (5)       | 75 (6)          | 81 (5)         |
|                                       | Not reported         | 156 (25)        | 690 (23)      | 232 (20)        | 458 (26)       |
| Hepatitis B coinfection (ever)        | Positive             | 25 (4)          | 127 (4)       | 35 (3)          | 92 (5)         |
|                                       | Negative             | 498 (80)        | 2372 (80)     | 945 (79)        | 1427 (80)      |
|                                       | Not reported         | 103 (16)        | 483 (16)      | 222 (18)        | 261 (15)       |
| Hepatitis C coinfection (ever)        | Positive             | 76 (12)         | 324 (11)      | 84 (7)          | 240 (13)       |
|                                       | Negative             | 482 (77)        | 2351 (79)     | 1010 (84)       | 1341 (75)      |
|                                       | Not reported         | 68 (11)         | 307 (10)      | 108 (9)         | 199 (12)       |
| Australian State capital city setting | Capital city         | 471 (75)        | 2106 (71)     | 853 (71)        | 1253 (70)      |
|                                       | Non-capital city     | 155 (25)        | 876 (29)      | 349 (29)        | 527 (30)       |
| Primary care setting                  | General Practice     | 263 (42)        | 1097 (37)     | 467 (39)        | 630 (35)       |
|                                       | Hospital Clinic      | 133 (21)        | 664 (22)      | 247 (20)        | 417 (23)       |
|                                       | Sexual Health Clinic | 230 (37)        | 1221 (41)     | 488 (41)        | 733 (41)       |

**SDC Table 2: Factors associated with late HIV diagnosis: defined as CD4 cell count at diagnosis <350 cells/ $\mu$ L and or new AIDS illness within 6 months of HIV diagnosis.**

| Factor                                | Level                | Univariate Model |              |                | Multivariable Model |              |                |
|---------------------------------------|----------------------|------------------|--------------|----------------|---------------------|--------------|----------------|
|                                       |                      | OR               | 95% CI       | P <sup>#</sup> | aOR                 | 95% CI       | P <sup>#</sup> |
| Sex                                   | Female               | 0.96             | [0.60, 1.53] | 0.86           | 0.56                | [0.32, 0.99] | 0.05           |
|                                       | Male                 | 1.00             | [ref]        |                | 1.00                | [ref]        |                |
| Age at cohort enrolment (years)       | <i>less</i> 30       | 1.00             | [ref]        | <0.01          | 1.00                | [ref]        | <0.01          |
|                                       | 30 to 40             | 1.32             | [0.89, 1.96] |                | 1.27                | [0.84, 1.92] |                |
|                                       | 40 to 50             | 1.67             | [1.12, 2.49] |                | 1.61                | [1.06, 2.49] |                |
|                                       | <i>greater</i> 50    | 3.39             | [2.23, 5.17] |                | 2.93                | [1.88, 4.60] |                |
| Mode of probable HIV exposure         | MSM                  | 1.00             | [ref]        | <0.01          | 1.00                | [ref]        | <0.01          |
|                                       | Heterosexual         | 1.65             | [1.24, 2.20] |                | 1.88                | [1.33, 2.67] |                |
|                                       | IDU                  | 1.21             | [0.65, 2.23] |                | 1.48                | [0.76, 2.91] |                |
|                                       | Other                | 2.13             | [1.21, 3.74] |                | 1.68                | [0.92, 3.05] |                |
| Continental region of birth           | Australia            | 1.00             | [ref]        | <0.01          | 1.00                | [ref]        | <0.01          |
|                                       | NZ/Pacific Is.       | 0.89             | [0.41, 2.02] |                | 0.92                | [0.40, 2.15] |                |
|                                       | Africa               | 3.91             | [1.64, 9.35] |                | 4.72                | [1.84, 12.1] |                |
|                                       | Americas             | 2.35             | [0.90, 6.16] |                | 2.04                | [0.73, 5.68] |                |
|                                       | Asian                | 1.79             | [1.12, 2.86] |                | 2.13                | [1.28, 3.55] |                |
|                                       | Europe               | 1.64             | [1.01, 2.65] |                | 1.64                | [0.98, 2.75] |                |
|                                       | Not reported         | 1.14             | [0.84, 1.56] |                | 0.79                | [0.56, 1.12] |                |
| Hepatitis B Co-infection              | Positive             | 1.64             | [0.84, 3.23] | 0.03           | 1.56                | [0.77, 3.18] | 0.41           |
|                                       | Negative             | 1.00             | [ref]        |                | 1.00                | [ref]        |                |
|                                       | Not reported         | 0.70             | [0.51, 0.97] |                | 0.92                | [0.62, 1.37] |                |
| Hepatitis C Co-infection              | Positive             | 0.73             | [0.45, 1.18] | 0.07           | 0.73                | [0.43, 1.24] | 0.19           |
|                                       | Negative             | 1.00             | [ref]        |                | 1.00                | [ref]        |                |
|                                       | Not reported         | 0.63             | [0.40, 0.98] |                | 0.64                | [0.36, 1.11] |                |
| Australian State capital city setting | Capital city         | 1.00             | [ref]        | 0.03           | 1.00                | [ref]        | 0.06           |
|                                       | Non-capital city     | 1.33             | [1.03, 1.72] |                | 1.56                | [0.99, 2.46] |                |
| Primary care setting                  | General Practice     | 0.72             | [0.55, 0.94] | <0.01          | 0.98                | [0.63, 1.54] | 0.03           |
|                                       | Hospital Clinic      | 1.17             | [0.86, 1.60] |                | 1.62                | [1.00, 2.61] |                |
|                                       | Sexual Health Clinic | 1.00             | [ref]        |                | 1.00                | [ref]        |                |
| Year of HIV diagnosis                 | 1996 to 2000         | 1.00             | [ref]        | <0.01          | 1.00                | [ref]        | <0.01          |
|                                       | 2001 to 2006         | 0.54             | [0.41, 0.72] |                | 0.49                | [0.36, 0.67] |                |
|                                       | 2007 to 2012         | 0.83             | [0.62, 1.12] |                | 0.77                | [0.56, 1.06] |                |

<sup>#</sup>Wald-test for categorical level heterogeneity

**SDC Table 3: Cox proportional hazard\* of time to ART treatment interruption (>30 days) by HIV presentation status.**

| Factor                                     | interrupt / pyrs | Rate / 100 py [95% CI] | aHR <sup>a</sup>  | p       |
|--------------------------------------------|------------------|------------------------|-------------------|---------|
| <u>Year of ART initiation</u>              |                  |                        |                   |         |
| 1996 to 2000                               | 94 / 963         | 9.8 [8.0, 11.8]        | 1.00 [ref]        | <0.0001 |
| 2001 to 2006                               | 67 / 815         | 8.2 [6.4, 10.3]        | 1.07 [0.76, 1.50] |         |
| 2007 to 2012                               | 14 / 873         | 1.6 [0.9, 2.7]         | 0.16 [0.09, 0.28] |         |
| <u>HIV presentation status<sup>b</sup></u> |                  |                        |                   |         |
| late HIV diagnosis                         | 58 / 1255        | 4.6 [3.5, 5.9]         | 0.92 [0.56, 1.52] | <0.0001 |
| CD4 <sub>ART</sub> <350 cells/μL           | 24 / 596         | 4.0 [2.6, 5.9]         | 1.00 [ref]        |         |
| CD4 <sub>ART</sub> ≥350 cells/μL           | 93 / 800         | 11.6 [9.5, 14.1]       | 2.00 [1.25, 3.22] |         |

<sup>a</sup>model adjusted for **year of ART initiation, HIV presentation status**, age, sex, HIV exposure, primary care clinic type.

<sup>b</sup>late HIV diagnosis: CD4 cell count at HIV diagnosis <350 cells/μL and or new AIDS illness within 6mth of diagnosis;

CD4<sub>ART</sub> <350 cells/μL: CD4 cell count at HIV diagnosis >350 cells/μL and CD4 cell count at ART initiation <350 cells/μL;

CD4<sub>ART</sub> ≥350 cells/μL: CD4 cell count at HIV diagnosis >350 cells/μL and CD4 cell count at ART initiation ≥350 cells/μL.

**SDC Table 4: Cox proportional hazard of time to first major change to ART treatment by HIV presentation status.**

| Factor <sup>b</sup>                        | switch / pyrs | rate / 100 py [95% CI] | aHR <sup>a</sup>  | p    |
|--------------------------------------------|---------------|------------------------|-------------------|------|
| <u>Year of ART initiation 1996 to 2000</u> |               |                        |                   |      |
| late HIV diagnosis                         | 61 / 490      | 12.4 [9.7, 15.7]       | 3.55 [1.11, 11.4] | 0.04 |
| CD4 <sub>ART</sub> <350 cells/μL           | 3 / 86        | 3.5 [0.7, 9.8]         | 1.00 [ref]        |      |
| CD4 <sub>ART</sub> ≥350 cells/μL           | 32 / 381      | 8.4 [5.8, 11.6]        | 2.41 [0.74, 7.88] |      |
| <u>Year of ART initiation 2001 to 2006</u> |               |                        |                   |      |
| late HIV diagnosis                         | 22 / 371      | 5.9 [3.8, 8.8]         | 0.58 [0.32, 1.05] | 0.08 |
| CD4 <sub>ART</sub> <350 cells/μL           | 22 / 203      | 10.8 [6.9, 15.9]       | 1.00 [ref]        |      |
| CD4 <sub>ART</sub> ≥350 cells/μL           | 16 / 314      | 5.1 [2.9, 8.1]         | 0.51 [0.27, 0.98] |      |
| <u>Year of ART initiation 2007 to 2012</u> |               |                        |                   |      |
| late HIV diagnosis                         | 22 / 280      | 7.9 [5.0, 11.7]        | 0.88 [0.49, 1.58] | 0.21 |
| CD4 <sub>ART</sub> <350 cells/μL           | 24 / 249      | 9.6 [6.3, 14.0]        | 1.00 [ref]        |      |
| CD4 <sub>ART</sub> ≥350 cells/μL           | 30 / 202      | 14.9 [10.2, 20.5]      | 1.41 [0.82, 2.41] |      |

<sup>a</sup>model adjusted for **year of ART initiation, HIV presentation status**, age, sex, HIV exposure, primary care clinic type.

<sup>b</sup>Late HIV diagnosis: CD4 cell count at HIV diagnosis <350 cells/μL and or new AIDS illness within 6mth of diagnosis;

CD4<sub>ART</sub> <350 cells/μL: CD4 cell count at HIV diagnosis >350 cells/μL and CD4 cell count at ART initiation <350 cells/μL;

CD4<sub>ART</sub> ≥350 cells/μL: CD4 cell count at HIV diagnosis >350 cells/μL and CD4 cell count at ART initiation ≥350 cells/μL..
